# Supplementary material
Source: PubMed Central journal article supplement (PMC3092260)
Supplement: supp_1947601910388271_DS_10.1177_1947601910388271_figS1.pdf [file supp_1947601910388271_DS_10.1177_1947601910388271_figS1.pdf]

## Supplemental Figure

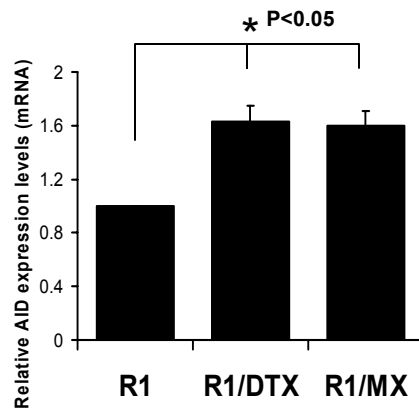

**Figure S1.** Elevated AID expression in drug resistant cells. Total RNAs collected from CWR-R1 or its derivatives were reversed transcribed as described in Methods. Real-time PCR was carried out using primers for AID normalized to 18S. \*P<0.05
